# Supplementary material for: In situ vocal fold properties and pitch prediction by dynamic actuation of the songbird syrinx
Source: PubMed Central journal article supplement (PMC5595934; doi:10.1038/s41598-017-11258-1), 2017-09-12
Supplement: 41598_2017_11258_MOESM3_ESM.pdf [file 41598_2017_11258_MOESM3_ESM.pdf]

## **Supplementary Information**

### **In situ vocal fold properties and pitch prediction by dynamic actuation of the songbird syrinx**

Daniel N. Düring<sup>1,2</sup>, Benjamin J. Knörlein<sup>3</sup>, Coen P.H. Elemans<sup>1,\*</sup>

<sup>1</sup> Department of Biology, University of Southern Denmark, Odense, Denmark

<sup>2</sup> Current address: Institute of Neuroinformatics, ETH Zurich and University of Zurich, Zurich, Switzerland

<sup>3</sup> Center for Computation and Visualization, Brown University, Providence RI, USA

\*Correspondence to [coen@biology.sdu.dk](mailto:coen@biology.sdu.dk)

#### **Supplementary Video S1**

3D marker positions and ML strain changes during cyclical VS shortening.

#### **Supplementary Video S2**

3D marker positions and ML strain changes during cyclical MDS shortening.
